# Supplementary material for: Deletion of Irf4 in T Cells Suppressed Autoimmune Uveitis and Dysregulated Transcriptional Programs Linked to CD4+ T Cell Differentiation and Metabolism
Source: MDPI journal article supplement (doi:10.3390/ijms22052775), 2021-03-09
Supplement: s1 [file s1]

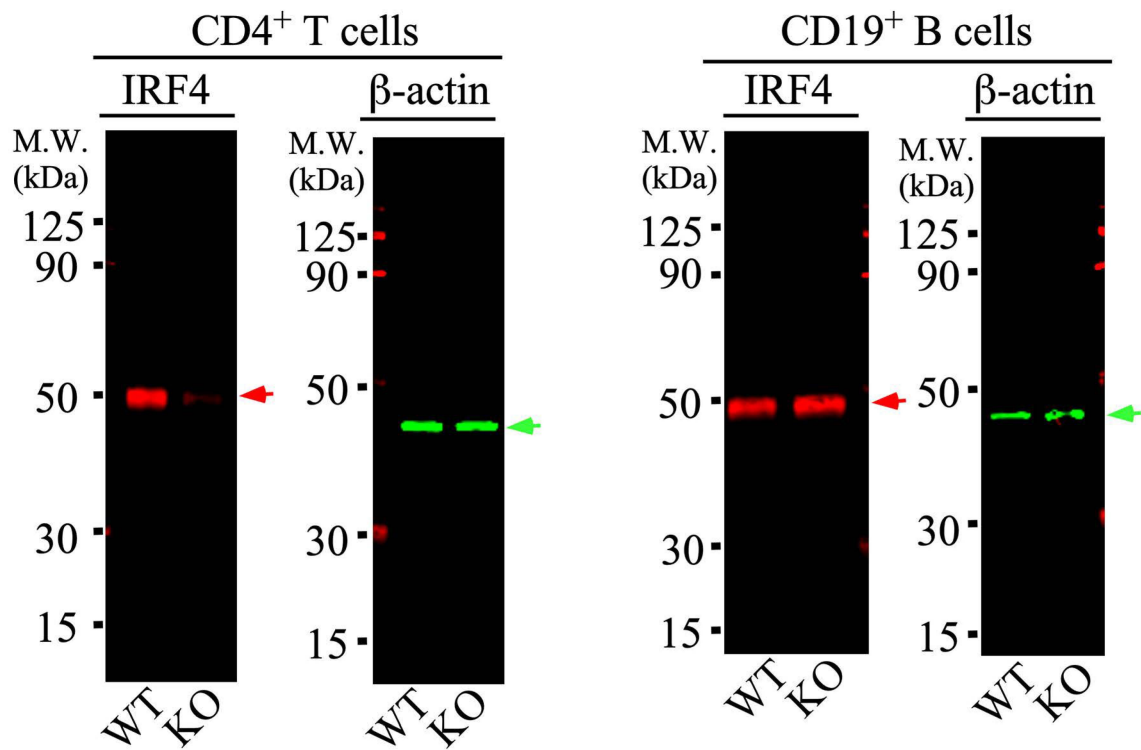

**Supplementary Figure S1.** Characterization of mice with targeted deletion of *irf4* in T cell. *Irf4<sup>fl/fl</sup>* mice by Western blot analysis. Figure represents full-length gels of image presented as Fig. 1B.

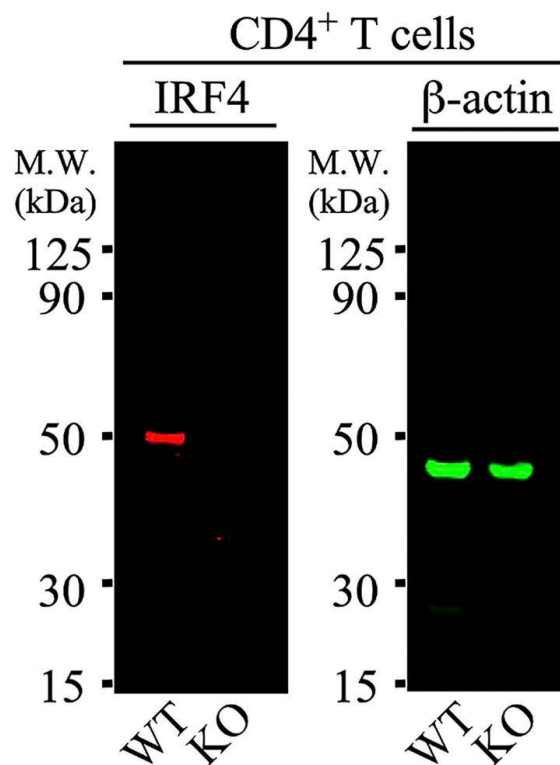

**Supplementary Figure S2.** Characterization of mice with targeted deletion of *irf4* in T cell. *Irf4<sup>fl/fl</sup>* mice by Western blot analysis. Figure represents full-length gels of image presented as Fig. 6C.
